# Supplementary material for: Facile synthesis of polyaniline/carbon dot nanocomposites and their application as a fluorescent probe to detect mercury
Source: Royal Society of Chemistry journal article supplement (doi:10.1039/c5ra03832d), 2015-01-01
Supplement: c5ra03832d1.pdf [file c5ra03832d1.pdf]

### Supporting Information

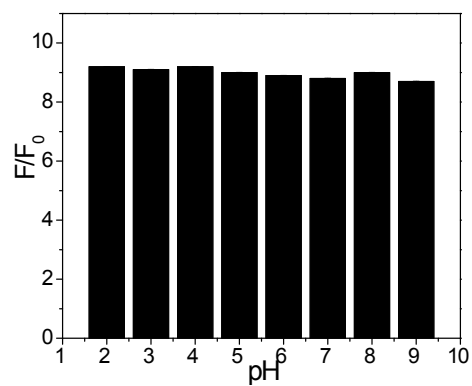

Fig. S1. Effects of Ph on the  $F/F_0$  value of sensor system. Conditions:  $Hg^{2+}$ , 0.8 nM.

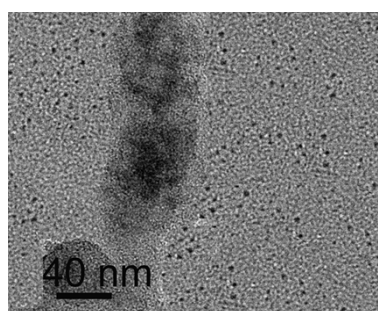

Fig. S2. TEM image after the addition of  $Hg^{2+}$ .
